# Supplementary material for: Direct detection of Corynebacterium striatum, Corynebacterium propinquum, and Corynebacterium simulans in sputum samples by high-resolution melt curve analysis
Source: Springer Nature journal article supplement (doi:10.1186/s12879-020-05633-z), 2021-01-07
Supplement: MOESM2 [file 18747440]

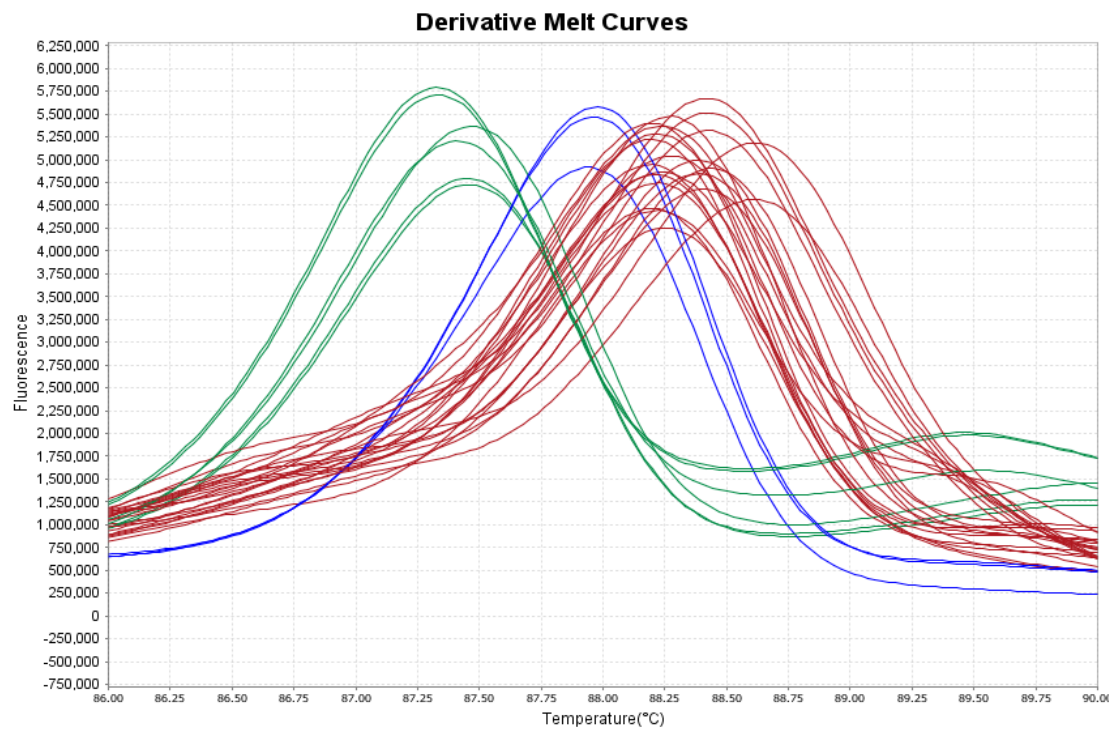

**Additional file 2. Representative results of clinical isolates tested by High resolution melting graphs.**
